# Supplementary material for: Racial and Ethnic Differences in COVID-19 Outcomes, Stressors, Fear, and Prevention Behaviors Among US Women: Web-Based Cross-sectional Study
Source: PubMed Central journal article supplement (PMC8276781; doi:10.2196/26296), 2021-07-12
Supplement: jmir_v23i7e26296_app1.pdf [file jmir_v23i7e26296_app1.pdf]

**Multimedia Appendix 1.** Demographic characteristics by racial/ethnic group among adult women in the United States (N=473).<sup>a</sup>

| Characteristic                                                | Overall (N=473) | White (n=241)               | API <sup>b</sup> (n=64)    | Black (n=60)                 | Latinx (n=48)            | AIAN <sup>c</sup> (n=27)        | Multiracial or other (n=33) | <i>P</i> value |
|---------------------------------------------------------------|-----------------|-----------------------------|----------------------------|------------------------------|--------------------------|---------------------------------|-----------------------------|----------------|
| Age (years), median (IQR)                                     | 33 (28-40)      | 36 (30-46) <sup>d,e,f</sup> | 31 (28.5-33) <sup>d</sup>  | 32 (27-38.5)                 | 32.5 (28.5-38)           | 29 (26-33) <sup>e</sup>         | 29 (23-37) <sup>f</sup>     | <.001          |
| <b>Education, n (%)</b>                                       |                 |                             |                            |                              |                          |                                 |                             | .01            |
| Completed high school/GED <sup>g</sup> or less                | 86 (18.6)       | 32 (13.3)                   | 17 (27.9)                  | 11 (19.3)                    | 15 (33.3)                | 4 (15.4)                        | 7 (21.2)                    |                |
| Some or completed trade school, vocational school, or college | 256 (55.3)      | 130 (53.9)                  | 36 (59.0)                  | 31 (54.4)                    | 22 (48.9)                | 18 (69.2)                       | 19 (57.6)                   |                |
| Some or completed graduate school                             | 121 (26.1)      | 79 (32.8) <sup>h,i</sup>    | 8 (13.1) <sup>h</sup>      | 15 (26.3)                    | 8 (17.8) <sup>i</sup>    | 4 (15.4)                        | 7 (21.2)                    |                |
| Unemployed, n (%)                                             | 175 (37.0)      | 84 (34.9) <sup>j</sup>      | 34 (53.1) <sup>j,k,l</sup> | 22 (36.7)                    | 14 (29.2) <sup>k</sup>   | 6 (22.2) <sup>l</sup>           | 15 (45.5)                   | .03            |
| Unemployed as of March 1, 2020 <sup>m</sup> , n (%)           | 65 (37.1)       | 26 (31.0)                   | 16 (47.1)                  | 9 (40.9)                     | 3 (21.4)                 | 2 (33.3)                        | 9 (60.0)                    | .17            |
| <b>Sexual orientation, n (%)</b>                              |                 |                             |                            |                              |                          |                                 |                             | .20            |
| Heterosexual                                                  | 383 (82.0)      | 190 (79.2)                  | 56 (91.8)                  | 48 (81.4)                    | 40 (85.1)                | 25 (92.6)                       | 24 (72.7)                   |                |
| Gay or lesbian                                                | 20 (4.3)        | 13 (5.4)                    | 1 (1.6)                    | 3 (5.1)                      | 1 (2.1)                  | 2 (7.4)                         | 0 (0)                       |                |
| Bisexual                                                      | 48 (10.3)       | 26 (10.8)                   | 4 (6.6)                    | 7 (11.9)                     | 5 (10.6)                 | 0 (0)                           | 6 (18.2)                    |                |
| Other <sup>n</sup>                                            | 16 (3.4)        | 11 (4.6)                    | 0 (0)                      | 1 (1.7)                      | 1 (2.1)                  | 0 (0)                           | 3 (9.1)                     |                |
| In a current relationship, n (%)                              | 323 (68.6)      | 163 (67.9) <sup>o,p</sup>   | 48 (75.0) <sup>q,r</sup>   | 30 (50.0) <sup>o,q,s,t</sup> | 34 (70.8) <sup>s,u</sup> | 26 (100.0) <sup>p,r,t,u,v</sup> | 22 (66.7) <sup>v</sup>      | <.001          |

| Characteristic                                                      | Overall (N=473) | White (n=241)               | API <sup>b</sup> (n=64)      | Black (n=60)                  | Latinx (n=48)                 | AIAN <sup>c</sup> (n=27)        | Multiracial or other (n=33) | P value |
|---------------------------------------------------------------------|-----------------|-----------------------------|------------------------------|-------------------------------|-------------------------------|---------------------------------|-----------------------------|---------|
| <b>Relationship status<sup>w</sup>, n (%)</b>                       |                 |                             |                              |                               |                               |                                 |                             | <.001   |
| Casual dating                                                       | 43 (13.5)       | 5 (3.1) <sup>d,p,x,y</sup>  | 11 (23.4) <sup>d,z,aa</sup>  | 8 (27.6) <sup>x,ab</sup>      | 2 (6.1) <sup>z,ab,ac,ad</sup> | 14 (53.9) <sup>p,aa,ac,ae</sup> | 3 (14.3) <sup>y,ad,ae</sup> |         |
| Committed, not married                                              | 99 (31.1)       | 50 (30.9)                   | 15 (31.9)                    | 9 (31.0)                      | 6 (18.2)                      | 7 (26.9)                        | 12 (57.1)                   |         |
| Married                                                             | 170 (53.5)      | 102 (63.0)                  | 21 (44.7)                    | 11 (37.9)                     | 25 (75.8)                     | 5 (19.2)                        | 6 (28.6)                    |         |
| Separated <sup>af</sup>                                             | 6 (1.9)         | 5 (3.1)                     | 0 (0)                        | 1 (3.5)                       | 0 (0)                         | 0 (0)                           | 0 (0)                       |         |
| Has children, n (%)                                                 | 208 (44.2)      | 128 (53.1) <sup>f,h,p</sup> | 19 (30.2) <sup>h</sup>       | 26 (44.1) <sup>ag</sup>       | 23 (48.0) <sup>u</sup>        | 3 (11.1) <sup>p,u,ag</sup>      | 9 (27.3) <sup>f</sup>       | <.001   |
| <b>Household composition, median (IQR)</b>                          |                 |                             |                              |                               |                               |                                 |                             |         |
| Number of children <18 years in household                           | 2 (1-3)         | 2 (1-3)                     | 3 (2-4)                      | 2 (1-3)                       | 1 (1-3)                       | 3 (1-3)                         | 2 (2-4)                     | .32     |
| Number of children ≥18 years in household                           | 2 (0-3)         | 1.5 (0-3)                   | 5 (5-5)                      | 2 (1-3)                       | 1 (0-3)                       | — <sup>ah</sup>                 | 3 (0-3)                     | .50     |
| Number of people living with                                        | 3 (2-4)         | 3 (2-4) <sup>ai</sup>       | 3 (2-4)                      | 4 (3-4) <sup>aj</sup>         | 3 (2-5)                       | 2 (2-2.5) <sup>ai,aj</sup>      | 2 (2-3)                     | .002    |
| <b>Household composition: type of occupants<sup>ak</sup>, n (%)</b> |                 |                             |                              |                               |                               |                                 |                             |         |
| Only self                                                           | 211 (45.8)      | 110 (45.6)                  | 20 (33.9)                    | 33 (56.9)                     | 25 (54.4)                     | 10 (41.7)                       | 13 (39.4)                   | .14     |
| Significant other, partner, or spouse                               | 138 (55.2)      | 68 (51.9) <sup>j</sup>      | 30 (76.9) <sup>j,al,am</sup> | 9 (36.0) <sup>al,an</sup>     | 14 (66.7) <sup>an</sup>       | 8 (57.1)                        | 9 (45.0) <sup>am</sup>      | .02     |
| Other family members                                                | 133 (53.2)      | 85 (64.9) <sup>d,e,ao</sup> | 12 (30.8) <sup>d,ap</sup>    | 16 (64.0) <sup>ap,aq,ar</sup> | 10 (47.6)                     | 4 (28.6) <sup>e,aq</sup>        | 6 (30.0) <sup>ao,ar</sup>   | <.001   |

| Characteristic                                             | Overall (N=473) | White (n=241)                  | API <sup>b</sup> (n=64)  | Black (n=60)           | Latinx (n=48)             | AIAN <sup>c</sup> (n=27) | Multiracial or other (n=33) | P value |
|------------------------------------------------------------|-----------------|--------------------------------|--------------------------|------------------------|---------------------------|--------------------------|-----------------------------|---------|
| Friends                                                    | 17 (6.8)        | 7 (5.3)                        | 2 (5.1)                  | 2 (8.0)                | 2 (9.5)                   | 2 (14.3)                 | 2 (10.0)                    | .56     |
| Roommates                                                  | 22 (8.8)        | 10 (7.6) <sup>f</sup>          | 3 (7.7)                  | 1 (4.0) <sup>as</sup>  | 0 (0) <sup>at</sup>       | 2 (14.3)                 | 6 (30.0) <sup>f,as,at</sup> | .03     |
| <b>Type of residential community, n (%)</b>                |                 |                                |                          |                        |                           |                          |                             | <.001   |
| Urban or city                                              | 212 (45.5)      | 77 (32.1) <sup>d,f,x,au</sup>  | 37 (59.7) <sup>d</sup>   | 38 (65.5) <sup>x</sup> | 24 (50.0)                 | 17 (65.4) <sup>au</sup>  | 19 (59.4) <sup>f</sup>      |         |
| Rural                                                      | 82 (17.6)       | 54 (22.5)                      | 5 (8.1)                  | 7 (12.1)               | 9 (18.8)                  | 3 (11.5)                 | 4 (12.5)                    |         |
| Suburban                                                   | 172 (36.9)      | 109 (45.4)                     | 20 (32.3)                | 13 (22.4)              | 15 (31.3)                 | 6 (23.1)                 | 9 (28.1)                    |         |
| <b>Current living situation, n (%)</b>                     |                 |                                |                          |                        |                           |                          |                             | .28     |
| Living in own place, room, apartment, or house             | 412 (91.0)      | 214 (91.5)                     | 54 (91.5)                | 49 (86.0)              | 40 (90.9)                 | 24 (88.9)                | 31 (96.9)                   |         |
| Temporarily doubled up with others in someone else's house | 31 (6.8)        | 16 (6.8)                       | 5 (8.5)                  | 4 (7.0)                | 4 (9.1)                   | 2 (7.4)                  | 0 (0)                       |         |
| Other living situation <sup>av</sup>                       | 10 (2.2)        | 4 (1.7)                        | 0 (0)                    | 4 (7.0)                | 0 (0)                     | 1 (3.7)                  | 1 (3.1)                     |         |
| <b>Household income (US \$), n (%)</b>                     |                 |                                |                          |                        |                           |                          |                             | <.001   |
| <30,000                                                    | 139 (31.1)      | 45 (20.0)                      | 34 (54.0)                | 20 (35.7)              | 12 (26.7)                 | 14 (51.9)                | 14 (45.2)                   |         |
| 30,000-49,999                                              | 115 (25.7)      | 51 (22.7)                      | 15 (23.8)                | 17 (30.4)              | 14 (31.1)                 | 10 (37.0)                | 8 (25.8)                    |         |
| ≥50,000                                                    | 193 (43.2)      | 129 (57.3) <sup>d,o,p,ao</sup> | 14 (22.2) <sup>d,k</sup> | 19 (33.9) <sup>o</sup> | 19 (42.2) <sup>k,aw</sup> | 3 (11.1) <sup>p,aw</sup> | 9 (29.0) <sup>ao</sup>      |         |

<sup>a</sup>Certain percentages may reflect denominators smaller than the n value given in the column heading. These discrepancies are due to missing data.

<sup>b</sup>API: Asian, Native Hawaiian, or other Pacific Islander.

<sup>c</sup>AIAN: American Indian or Alaskan Native.

<sup>d</sup>The difference between White and API women is statistically significant at  $P < .001$ .

<sup>e</sup>The difference between White and AIAN women is statistically significant at  $P = .01$ .

<sup>f</sup>The difference between White and multiracial/other race women is statistically significant at  $P = .01$ .

<sup>g</sup>GED: General Educational Development.

<sup>h</sup>The difference between White and API women is statistically significant at  $P = .001$ .

<sup>i</sup>The difference between White and Latinx women is statistically significant at  $P = .002$ .

<sup>j</sup>The difference between White and API women is statistically significant at  $P = .01$ .

<sup>k</sup>The difference between API and Latinx women is statistically significant at  $P = .01$ .

<sup>l</sup>The difference between API and AIAN women is statistically significant at  $P = .01$ .

<sup>m</sup>Percentages correspond with the 175 women who said they were unemployed.

<sup>n</sup>Includes 7 unsure and 9 other.

<sup>o</sup>The difference between White and Black women is statistically significant at  $P = .01$ .

<sup>p</sup>The difference between White and AIAN women is statistically significant at  $P < .001$ .

<sup>q</sup>The difference between API and Black women is statistically significant at  $P = .004$ .

<sup>r</sup>The difference between API and AIAN women is statistically significant at  $P = .004$ .

<sup>s</sup>The difference between Black and Latinx women is statistically significant at  $P = .03$ .

<sup>t</sup>The difference between Black and AIAN women is statistically significant at  $P < .001$ .

<sup>u</sup>The difference between Latinx and AIAN women is statistically significant at  $P = .001$ .

<sup>v</sup>The difference between AIAN and multiracial/other race women is statistically significant at  $P = .001$ .

<sup>w</sup>Percentages correspond with the 318 women who said they were in a current relationship and answered this question.

<sup>x</sup>The difference between White and Black women is statistically significant at  $P < .001$ .

<sup>y</sup>The difference between White and multiracial/other race women is statistically significant at  $P = .004$ .

<sup>z</sup>The difference between API and Latinx women is statistically significant at  $P = .02$ .

<sup>aa</sup>The difference between API and AIAN women is statistically significant at  $P = .02$ .

<sup>ab</sup>The difference between Black and Latinx women is statistically significant at  $P = .01$ .

<sup>ac</sup>The difference between Latinx and AIAN women is statistically significant at  $P < .001$ .

<sup>ad</sup>The difference between Latinx and multiracial/other race women is statistically significant at  $P = .002$ .

<sup>ae</sup>The difference between AIAN and multiracial/other race women is statistically significant at  $P = .02$ .

<sup>af</sup>Includes separated, not seeing someone else, and seeing someone casually.

<sup>ag</sup>The difference between Black and AIAN women is statistically significant at  $P = .003$ .

<sup>ah</sup>AIAN women reported 0 children 18 years or older currently staying in their household.

<sup>ai</sup>The difference between White and AIAN women is statistically significant at  $P = .02$ .

<sup>aj</sup>The difference between Black and AIAN women is statistically significant at  $P = .02$ .

<sup>ak</sup>Percentages for significant others, other family members, friends, and roommates correspond with the 250 women who reported currently living or staying with other people.

<sup>al</sup>The difference between API and Black women is statistically significant at  $P=.001$ .

<sup>am</sup>The difference between API and multiracial/other race women is statistically significant at  $P=.01$ .

<sup>an</sup>The difference between Black and Latinx women is statistically significant at  $P=.04$ .

<sup>ao</sup>The difference between White and multiracial/other race women is statistically significant at  $P=.003$ .

<sup>ap</sup>The difference between API and Black women is statistically significant at  $P=.01$ .

<sup>aq</sup>The difference between Black and AIAN women is statistically significant at  $P=.03$ .

<sup>ar</sup>The difference between Black and multiracial/other race women is statistically significant at  $P=.02$ .

<sup>as</sup>The difference between Black and multiracial/other race women is statistically significant at  $P=.03$ .

<sup>at</sup>The difference between Latinx and multiracial/other race women is statistically significant at  $P=.01$ .

<sup>au</sup>The difference between White and AIAN women is statistically significant at  $P=.003$ .

<sup>av</sup>Includes temporary/transitional housing, single room occupancy hotel, shelter, drug treatment housing, abandoned building, and street.

<sup>aw</sup>The difference between Latinx and AIAN women is statistically significant at  $P=.01$ .
