# Supplementary material for: Racial and Ethnic Differences in COVID-19 Outcomes, Stressors, Fear, and Prevention Behaviors Among US Women: Web-Based Cross-sectional Study
Source: PubMed Central journal article supplement (PMC8276781; doi:10.2196/26296), 2021-07-12
Supplement: jmir_v23i7e26296_app2.pdf [file jmir_v23i7e26296_app2.pdf]

**Multimedia Appendix 2.** COVID-19 outcomes by racial/ethnic group among adult women in the United States (N=473).<sup>a</sup>

| Outcome                                                                                 | Overall (N=473), n (%) | White (n=241), n (%)        | API <sup>b</sup> (n=64), n (%) | Black (n=60), n (%)      | Latinx (n=48), n (%)   | AIAN <sup>c</sup> (n=27), n (%) | Multiracial or other (n=33), n (%) | P value          |
|-----------------------------------------------------------------------------------------|------------------------|-----------------------------|--------------------------------|--------------------------|------------------------|---------------------------------|------------------------------------|------------------|
| Have had COVID-19 symptoms                                                              | 73 (15.5)              | 45 (18.8)                   | 4 (6.4)                        | 6 (10.0)                 | 8 (17.0)               | 3 (11.1)                        | 7 (21.2)                           | .12              |
| Been tested for COVID-19                                                                | 27 (5.8)               | 16 (6.7)                    | 3 (4.7)                        | 3 (5.0)                  | 3 (6.3)                | 2 (7.4)                         | 0 (0)                              | .77              |
| Know where to go to get tested for COVID-19                                             | 227 (51.4)             | 133 (59.9) <sup>d,e,f</sup> | 21 (34.4) <sup>d,g</sup>       | 33 (57.9) <sup>g,h</sup> | 18 (40.0) <sup>e</sup> | 8 (32.0) <sup>f,h</sup>         | 14 (43.8)                          | <.001            |
| Had a positive COVID-19 test result                                                     | 8 (1.7)                | 3 (1.3)                     | 0 (0)                          | 3 (5.1)                  | 0 (0)                  | 1 (3.7)                         | 1 (3.0)                            | .13              |
| Hospitalized for COVID-19 treatment <sup>i</sup>                                        | 4 (50.0)               | 1 (33.3)                    | 0 (0)                          | 1 (33.3)                 | 0 (0)                  | 1 (100.0)                       | 1 (100.0)                          | >.99             |
| Had someone close to you test positive for COVID-19                                     | 82 (17.5)              | 51 (21.3) <sup>j</sup>      | 5 (7.9) <sup>j,k</sup>         | 14 (23.3) <sup>k</sup>   | 7 (14.9)               | 2 (7.7)                         | 3 (9.1)                            | .05              |
| <b>Relationship of people close to you who tested positive for COVID-19<sup>l</sup></b> |                        |                             |                                |                          |                        |                                 |                                    |                  |
| Family                                                                                  | 35 (42.7)              | 19 (37.3)                   | 1 (20.0)                       | 11 (78.6)                | 2 (28.6)               | 1 (50.0)                        | 1 (33.3)                           | .05              |
| Friend                                                                                  | 55 (67.1)              | 36 (70.6)                   | 2 (40.0)                       | 6 (42.9)                 | 6 (85.7)               | 2 (100.0)                       | 3 (100.0)                          | .11              |
| Partner                                                                                 | 2 (2.4)                | 1 (2.0)                     | 0 (0)                          | 0 (0)                    | 0 (0)                  | 1 (50.0)                        | 0 (0)                              | .17              |
| Coworker                                                                                | 15 (18.3)              | 6 (11.8)                    | 1 (20.0)                       | 4 (28.6)                 | 3 (42.9)               | 1 (50.0)                        | 0 (0)                              | .12              |
| Other <sup>m</sup>                                                                      | 1 (1.2)                | 0 (0)                       | 0 (0)                          | 0 (0)                    | 0 (0)                  | 0 (0)                           | 1 (33.3)                           | N/A <sup>n</sup> |
| Had someone close to you hospitalized for COVID-19 <sup>l</sup>                         | 35 (42.7)              | 15 (29.4) <sup>o</sup>      | 2 (40.0)                       | 11 (78.6) <sup>o</sup>   | 3 (42.9)               | 2 (100.0)                       | 2 (66.7)                           | .004             |
| <b>Relationship of people close to you hospitalized for COVID-19<sup>p</sup></b>        |                        |                             |                                |                          |                        |                                 |                                    |                  |

| Outcome                                                                                    | Overall (N=473), n (%) | White (n=241), n (%)  | API <sup>b</sup> (n=64), n (%) | Black (n=60), n (%)   | Latinx (n=48), n (%) | AIAN <sup>c</sup> (n=27), n (%) | Multiracial or other (n=33), n (%) | P value |
|--------------------------------------------------------------------------------------------|------------------------|-----------------------|--------------------------------|-----------------------|----------------------|---------------------------------|------------------------------------|---------|
| Family                                                                                     | 16 (45.7)              | 4 (26.7) <sup>a</sup> | 0 (0)                          | 9 (81.8) <sup>a</sup> | 2 (66.7)             | 1 (50.0)                        | 0 (0)                              | .01     |
| Friend                                                                                     | 14 (40.0)              | 6 (40.0)              | 1 (50.0)                       | 2 (18.2)              | 2 (66.7)             | 1 (50.0)                        | 2 (100.0)                          | .23     |
| Coworker                                                                                   | 7 (20.0)               | 3 (20.0)              | 1 (50.0)                       | 2 (18.2)              | 1 (33.3)             | 0 (0)                           | 0 (0)                              | .87     |
| Other <sup>r</sup>                                                                         | 3 (8.6)                | 3 (20.0)              | 0 (0)                          | 0 (0)                 | 0 (0)                | 0 (0)                           | 0 (0)                              | .61     |
| Had someone close to you die from COVID-19 <sup>l</sup>                                    | 18 (22.0)              | 7 (13.7)              | 1 (20.0)                       | 5 (35.7)              | 2 (28.6)             | 1 (50.0)                        | 2 (66.7)                           | .08     |
| <b>Relationship of people you know who have died from COVID-19<sup>s</sup></b>             |                        |                       |                                |                       |                      |                                 |                                    |         |
| Family                                                                                     | 6 (33.3)               | 1 (14.3)              | 0 (0)                          | 3 (60.0)              | 2 (100.0)            | 0 (0)                           | 0 (0)                              | .15     |
| Friend                                                                                     | 8 (44.4)               | 2 (28.6)              | 0 (0)                          | 2 (40.0)              | 1 (50.0)             | 1 (100.0)                       | 2 (100.0)                          | .54     |
| Coworker                                                                                   | 4 (22.2)               | 1 (14.3)              | 1 (100.0)                      | 2 (40.0)              | 0 (0)                | 0 (0)                           | 0 (0)                              | .51     |
| Other <sup>t</sup>                                                                         | 3 (16.7)               | 3 (42.9)              | 0 (0)                          | 0 (0)                 | 0 (0)                | 0 (0)                           | 0 (0)                              | N/A     |
| Concerned that you may have been exposed to COVID-19 by these people you know <sup>l</sup> | 18 (22.0)              | 9 (17.7)              | 2 (40.0)                       | 3 (21.4)              | 2 (28.6)             | 1 (50.0)                        | 1 (33.3)                           | .46     |

<sup>a</sup>Certain percentages may reflect denominators smaller than the n value given in the column heading. These discrepancies are due to missing data.

<sup>b</sup>API: Asian, Native Hawaiian, or other Pacific Islander.

<sup>c</sup>AIAN: American Indian or Alaskan Native.

<sup>d</sup>The difference between White and API women is statistically significant at  $P < .001$ .

<sup>e</sup>The difference between White and Latinx women is statistically significant at  $P=.01$ .

<sup>f</sup>The difference between White and AIAN women is statistically significant at  $P=.01$ .

<sup>g</sup>The difference between API and Black women is statistically significant at  $P=.01$ .

<sup>h</sup>The difference between Black and AIAN women is statistically significant at  $P=.03$ .

<sup>i</sup>Percentages correspond with the 8 women who tested positive for COVID-19.

<sup>j</sup>The difference between White and API women is statistically significant at  $P=.02$ .

<sup>k</sup>The difference between API and Black women is statistically significant at  $P=.02$ .

<sup>l</sup>Percentages correspond with the 82 women who knew someone close who tested positive for COVID-19.

<sup>m</sup>Includes two children in their home daycare.

<sup>n</sup>N/A: not applicable.

<sup>o</sup>The difference between White and Black women is statistically significant at  $P<.001$ .

<sup>p</sup>Percentages correspond with the 35 women who knew someone close to them who had been hospitalized for COVID-19.

<sup>q</sup>The difference between White and Black women is statistically significant at  $P=.01$ .

<sup>r</sup>Includes friend's dad, neighbor, and child of acquaintance.

<sup>s</sup>Percentages correspond with the 18 women who knew someone close to them who died from COVID-19.

<sup>t</sup>Includes childhood acquaintances, friend's dad, neighbor, and relative of friend.
