# Supplementary material for: Racial and Ethnic Differences in COVID-19 Outcomes, Stressors, Fear, and Prevention Behaviors Among US Women: Web-Based Cross-sectional Study
Source: PubMed Central journal article supplement (PMC8276781; doi:10.2196/26296), 2021-07-12
Supplement: jmir_v23i7e26296_app3.pdf [file jmir_v23i7e26296_app3.pdf]

**Multimedia Appendix 3.** COVID-19 stressors and fear by racial/ethnic group among adult women in the United States (N=473).<sup>a</sup>

| Characteristic                                                               | Overall (N=473) | White (n=241)                 | API <sup>b</sup> (n=64)  | Black (n=60)           | Latinx (n=48)           | AIAN <sup>c</sup> (n=27) | Multiracial or other (n=33) | <i>P</i> value |
|------------------------------------------------------------------------------|-----------------|-------------------------------|--------------------------|------------------------|-------------------------|--------------------------|-----------------------------|----------------|
| <b>COVID-19–related stressors, n (%)</b>                                     |                 |                               |                          |                        |                         |                          |                             |                |
| Not enough food and no money to buy more                                     | 82 (17.3)       | 18 (7.5) <sup>d,e,f,g,h</sup> | 23 (35.9) <sup>d,i</sup> | 14 (23.3) <sup>e</sup> | 9 (18.8) <sup>f,i</sup> | 9 (33.3) <sup>g</sup>    | 9 (27.3) <sup>h</sup>       | <.001          |
| Not enough money to pay rent                                                 | 91 (19.2)       | 24 (10.0) <sup>d,e,f,g</sup>  | 23 (35.9) <sup>d</sup>   | 17 (28.3) <sup>e</sup> | 10 (20.8) <sup>f</sup>  | 10 (37.0) <sup>g</sup>   | 7 (21.2)                    | <.001          |
| Taking care of a sick family member or friend without COVID-19               | 47 (9.9)        | 29 (12.0)                     | 2 (3.1)                  | 9 (15.0)               | 2 (4.2)                 | 2 (7.4)                  | 3 (9.1)                     | .13            |
| Taking care of a sick family member or friend with or possibly with COVID-19 | 15 (3.2)        | 7 (2.9)                       | 2 (3.1)                  | 2 (3.3)                | 1 (2.1)                 | 2 (7.4)                  | 1 (3.0)                     | .79            |
| Homeschooling children                                                       | 99 (20.9)       | 61 (25.3) <sup>j,k</sup>      | 8 (12.5) <sup>j</sup>    | 14 (23.3) <sup>l</sup> | 11 (22.9) <sup>m</sup>  | 0 (0) <sup>k,l,m</sup>   | 5 (15.2)                    | .02            |
| Not being able to go to the doctor or have a phone/video appointment         | 133 (28.1)      | 85 (35.3) <sup>n,o</sup>      | 10 (15.6) <sup>n</sup>   | 15 (25.0)              | 10 (20.8)               | 4 (14.8) <sup>o</sup>    | 9 (27.3)                    | .01            |
| Not being able to get important medication                                   | 22 (4.7)        | 11 (4.6)                      | 2 (3.1)                  | 2 (3.3)                | 3 (6.3)                 | 0 (0)                    | 4 (12.1)                    | .35            |
| Loss of income                                                               | 173 (36.6)      | 96 (39.8)                     | 19 (29.7)                | 21 (35.0)              | 15 (31.3)               | 7 (25.9)                 | 15 (45.5)                   | .36            |
| Going to work as an essential employee                                       | 73 (15.4)       | 40 (16.6)                     | 6 (9.4)                  | 14 (23.3)              | 8 (16.7)                | 2 (7.4)                  | 3 (9.1)                     | .20            |
| Other <sup>p</sup>                                                           | 26 (5.5)        | 17 (7.1) <sup>q</sup>         | 3 (4.7)                  | 0 (0) <sup>q,r</sup>   | 1 (2.1)                 | 1 (3.7)                  | 4 (12.1) <sup>r</sup>       | .09            |

| Characteristic                                                       | Overall (N=473) | White (n=241)            | API <sup>b</sup> (n=64) | Black (n=60)           | Latinx (n=48)            | AIAN <sup>c</sup> (n=27)    | Multiracial or other (n=33) | P value |
|----------------------------------------------------------------------|-----------------|--------------------------|-------------------------|------------------------|--------------------------|-----------------------------|-----------------------------|---------|
| None                                                                 | 99 (20.9)       | 50 (20.8)                | 12 (18.8)               | 10 (16.7)              | 12 (25.0)                | 8 (29.6)                    | 7 (21.2)                    | .77     |
| <b>Fear of coronavirus<sup>s</sup>, median (IQR)</b>                 | 22 (16-26)      | 22 (16-26)               | 21 (17-25.5)            | 21 (15-24)             | 22 (15-28)               | 24 (16-34)                  | 18 (15-24)                  | .21     |
| Afraid of losing life because of COVID-19                            | 3 (2-4)         | 3 (2-4)                  | 3 (2-4)                 | 3 (2-4)                | 3 (2-4)                  | 3 (2-5)                     | 2 (2-4)                     | .38     |
| Cannot sleep due to worry about getting COVID-19                     | 3 (2-4)         | 2 (1-4) <sup>t</sup>     | 3 (2-4) <sup>u</sup>    | 2 (1-3) <sup>u,v</sup> | 3 (1-4)                  | 3 (2-5) <sup>t,v,w</sup>    | 2 (2-3) <sup>w</sup>        | <.001   |
| Heart races when thinking about it                                   | 3 (2-4)         | 2 (1-4)                  | 3 (2-4)                 | 2 (1.5-3) <sup>x</sup> | 3 (1-4)                  | 3 (2-5) <sup>x</sup>        | 3 (2-3)                     | .02     |
| Afraid of COVID-19                                                   | 4 (3-4)         | 4 (3-4) <sup>y,z</sup>   | 3 (2-4) <sup>y</sup>    | 4 (3-4)                | 4 (3-5)                  | 4 (2-5)                     | 3 (2-4) <sup>z</sup>        | .002    |
| Become nervous or anxious when watching news stories on social media | 4 (3-4)         | 4 (3-4.5) <sup>aa</sup>  | 3 (2.5-4) <sup>aa</sup> | 4 (3-4)                | 4 (2-4)                  | 4 (3-5)                     | 4 (3-4)                     | .004    |
| Hands become clammy thinking about it                                | 2 (1-3)         | 2 (1-3) <sup>ab,ac</sup> | 3 (2-4)                 | 2 (1-3) <sup>ad</sup>  | 3 (2-4) <sup>ab,ae</sup> | 3 (2-5) <sup>ac,ad,af</sup> | 2 (1-2) <sup>ae,af</sup>    | <.001   |
| Uncomfortable thinking about COVID-19                                | 4 (2-4)         | 4 (3-4)                  | 3 (2-4)                 | 3 (2-4)                | 3 (2-4)                  | 4 (2-5)                     | 3 (3-4)                     | .05     |

<sup>a</sup>Certain percentages may reflect denominators smaller than the n value given in the column heading. These discrepancies are due to missing data.

<sup>b</sup>API: Asian, Native Hawaiian, or other Pacific Islander.

<sup>c</sup>AIAN: American Indian or Alaskan Native.

<sup>d</sup>The difference between White and API women is statistically significant at  $P < .001$ .

<sup>e</sup>The difference between White and Black women is statistically significant at  $P < .001$ .

<sup>f</sup>The difference between White and Latinx women is statistically significant at  $P = .03$ .

<sup>g</sup>The difference between White and AIAN women is statistically significant at  $P < .001$ .

<sup>h</sup>The difference between White and multiracial/other race women is statistically significant at  $P = .002$ .

<sup>i</sup>The difference between API and Latinx women is statistically significant at  $P = .046$ .

<sup>j</sup>The difference between White and API women is statistically significant at  $P = .03$ .

<sup>k</sup>The difference between White and AIAN women is statistically significant at  $P = .003$ .

<sup>l</sup>The difference between Black and AIAN women is statistically significant at  $P = .004$ .

<sup>m</sup>The difference between Latinx and AIAN women is statistically significant at  $P = .01$ .

<sup>n</sup>The difference between White and API women is statistically significant at  $P = .003$ .

<sup>o</sup>The difference between White and AIAN women is statistically significant at  $P = .03$ .

<sup>p</sup>Do not have text responses for this *other* variable.

<sup>q</sup>The difference between White and Black women is statistically significant at  $P = .03$ .

<sup>r</sup>The difference between Black and multiracial/other race women is statistically significant at  $P = .01$ .

<sup>s</sup>7-item, four-point Likert scale that includes questions such as whether a participant is afraid of COVID-19, uncomfortable thinking about COVID-19, hands become clammy thinking about it, afraid of losing life because of COVID-19, become nervous or anxious when watching news stories on social media, cannot sleep due to worry about getting COVID-19, and heart races when thinking about it.

<sup>t</sup>The difference between White and AIAN women is statistically significant at  $P = .01$ .

<sup>u</sup>The difference between API and Black women is statistically significant at  $P=.02$ .

<sup>v</sup>The difference between Black and AIAN women is statistically significant at  $P=.002$ .

<sup>w</sup>The difference between AIAN and multiracial/other race women is statistically significant at  $P=.01$ .

<sup>x</sup>The difference between Black and AIAN women is statistically significant at  $P=.04$ .

<sup>y</sup>The difference between White and API women is statistically significant at  $P=.01$ .

<sup>z</sup>The difference between White and multiracial/other race women is statistically significant at  $P=.02$ .

<sup>aa</sup>The difference between White and API women is statistically significant at  $P=.001$ .

<sup>ab</sup>The difference between White and Latinx women is statistically significant at  $P=.02$ .

<sup>ac</sup>The difference between White and AIAN women is statistically significant at  $P=.002$ .

<sup>ad</sup>The difference between Black and AIAN women is statistically significant at  $P=.03$ .

<sup>ae</sup>The difference between Latinx and multiracial/other race women is statistically significant at  $P=.02$ .

<sup>af</sup>The difference between AIAN and multiracial/other race women is statistically significant at  $P=.002$ .
