# Supplementary material for: Racial and Ethnic Differences in COVID-19 Outcomes, Stressors, Fear, and Prevention Behaviors Among US Women: Web-Based Cross-sectional Study
Source: PubMed Central journal article supplement (PMC8276781; doi:10.2196/26296), 2021-07-12
Supplement: jmir_v23i7e26296_app4.pdf [file jmir_v23i7e26296_app4.pdf]

**Multimedia Appendix 4.** COVID-19 public health prevention behaviors by racial/ethnic group among adult women in the United States (N=473).<sup>a</sup>

| Prevention behavior                                                           | Overall (N=473), n (%) | White (n=241), n (%)       | API <sup>b</sup> (n=64), n (%) | Black (n=60), n (%)        | Latinx (n=48), n (%)     | AIAN <sup>c</sup> (n=27), n (%) | Multiracial or other (n=33), n (%) | <i>P</i> value |
|-------------------------------------------------------------------------------|------------------------|----------------------------|--------------------------------|----------------------------|--------------------------|---------------------------------|------------------------------------|----------------|
| Washing hands with soap                                                       | 452 (95.6)             | 235 (97.5) <sup>d</sup>    | 62 (96.9) <sup>e</sup>         | 56 (93.3)                  | 46 (95.8)                | 22 (81.5) <sup>d,e</sup>        | 31 (93.9)                          | .01            |
| Avoiding touching your face                                                   | 374 (79.1)             | 181 (75.1)                 | 56 (87.5)                      | 48 (80.0)                  | 43 (89.6)                | 21 (77.8)                       | 25 (75.8)                          | .13            |
| Using disinfectants                                                           | 412 (87.1)             | 212 (88.0)                 | 57 (89.1)                      | 53 (88.3)                  | 38 (79.2)                | 24 (88.9)                       | 28 (84.9)                          | .64            |
| Staying home except for essential activities                                  | 419 (88.6)             | 220 (91.3)                 | 58 (90.6)                      | 52 (86.7)                  | 36 (75.0)                | 24 (88.9)                       | 29 (87.9)                          | .05            |
| Covering your mouth when you cough                                            | 389 (82.2)             | 203 (84.2)                 | 55 (85.9)                      | 48 (80.0)                  | 34 (70.8)                | 21 (77.8)                       | 28 (84.9)                          | .28            |
| Physical distancing or staying 6 feet away from people outside your household | 409 (86.5)             | 212 (88.0)                 | 59 (92.2)                      | 52 (86.7)                  | 36 (75.0)                | 21 (77.8)                       | 29 (87.9)                          | .09            |
| Physical distancing or staying 6 feet away from all others if you are sick    | 283 (59.8)             | 138 (57.3)                 | 47 (73.4)                      | 33 (55.0)                  | 31 (64.6)                | 15 (55.6)                       | 19 (57.6)                          | .23            |
| Isolating yourself at home and away from others if you are sick               | 284 (60.0)             | 143 (59.3) <sup>f</sup>    | 49 (76.6) <sup>f,g,h</sup>     | 31 (51.7) <sup>g</sup>     | 29 (60.4)                | 17 (63.0)                       | 15 (45.5) <sup>h</sup>             | .03            |
| Using a face mask in public                                                   | 377 (79.7)             | 196 (81.3)                 | 51 (79.7)                      | 48 (80.0)                  | 34 (70.8)                | 20 (74.1)                       | 28 (84.9)                          | .58            |
| Using gloves in public                                                        | 190 (40.2)             | 72 (29.9) <sup>i,j,k</sup> | 46 (71.9) <sup>i,l,m,n</sup>   | 26 (43.3) <sup>j,l,o</sup> | 18 (37.5) <sup>m,p</sup> | 19 (70.4) <sup>k,o,p,q</sup>    | 9 (27.3) <sup>n,q</sup>            | <.001          |

| Prevention behavior                      | Overall (N=473), n (%) | White (n=241), n (%)       | API <sup>b</sup> (n=64), n (%) | Black (n=60), n (%)    | Latinx (n=48), n (%)     | AIAN <sup>c</sup> (n=27), n (%) | Multiracial or other (n=33), n (%) | <i>P</i> value   |
|------------------------------------------|------------------------|----------------------------|--------------------------------|------------------------|--------------------------|---------------------------------|------------------------------------|------------------|
| Avoiding crowds                          | 387 (81.8)             | 208 (86.3)                 | 53 (82.8)                      | 47 (78.3)              | 34 (70.8)                | 19 (70.4)                       | 26 (78.8)                          | .07              |
| Not leaving your home for any activities | 206 (43.6)             | 80 (33.2) <sup>i,r,s</sup> | 45 (70.3) <sup>i,t,u</sup>     | 27 (45.0) <sup>t</sup> | 19 (39.6) <sup>u,v</sup> | 18 (66.7) <sup>r,v</sup>        | 17 (51.5) <sup>s</sup>             | <.001            |
| Other <sup>w</sup>                       | 1 (0.2)                | 0 (0)                      | 0 (0)                          | 0 (0)                  | 0 (0)                    | 0 (0)                           | 1 (3.0)                            | N/A <sup>s</sup> |

<sup>a</sup>Certain percentages may reflect denominators smaller than the n value given in the column heading. These discrepancies are due to missing data.

<sup>b</sup>API: Asian, Native Hawaiian, or other Pacific Islander.

<sup>c</sup>AIAN: American Indian or Alaskan Native.

<sup>d</sup>The difference between White and AIAN women is statistically significant at  $P=.002$ .

<sup>e</sup>The difference between API and AIAN women is statistically significant at  $P=.02$ .

<sup>f</sup>The difference between White and API women is statistically significant at  $P=.01$ .

<sup>g</sup>The difference between API and Black women is statistically significant at  $P=.004$ .

<sup>h</sup>The difference between API and multiracial/other race women is statistically significant at  $P=.002$ .

<sup>i</sup>The difference between White and API women is statistically significant at  $P<.001$ .

<sup>j</sup>The difference between White and Black women is statistically significant at  $P=.047$ .

<sup>k</sup>The difference between White and AIAN women is statistically significant at  $P<.001$ .

<sup>l</sup>The difference between API and Black women is statistically significant at  $P=.002$ .

<sup>m</sup>The difference between API and Latinx women is statistically significant at  $P<.001$ .

<sup>n</sup>The difference between API and multiracial/other race women is statistically significant at  $P < .001$ .

<sup>o</sup>The difference between Black and AIAN women is statistically significant at  $P = .02$ .

<sup>p</sup>The difference between Latinx and AIAN women is statistically significant at  $P = .01$ .

<sup>q</sup>The difference between AIAN and multiracial/other race women is statistically significant at  $P < .001$ .

<sup>r</sup>The difference between White and AIAN women is statistically significant at  $P = .001$ .

<sup>s</sup>The difference between White and multiracial/other race women is statistically significant at  $P = .04$ .

<sup>t</sup>The difference between API and Black women is statistically significant at  $P = .01$ .

<sup>u</sup>The difference between API and Latinx women is statistically significant at  $P = .001$ .

<sup>v</sup>The difference between Latinx and AIAN women is statistically significant at  $P = .02$ .

<sup>w</sup>Do not have text responses for this *other* variable.

<sup>x</sup>N/A: not applicable.
