# Supplementary material for: Racial and Ethnic Differences in COVID-19 Outcomes, Stressors, Fear, and Prevention Behaviors Among US Women: Web-Based Cross-sectional Study
Source: PubMed Central journal article supplement (PMC8276781; doi:10.2196/26296), 2021-07-12
Supplement: jmir_v23i7e26296_app5.pdf [file jmir_v23i7e26296_app5.pdf]

**Multimedia Appendix 5.** Unadjusted and adjusted binary logistic regression models of COVID-19 related outcomes, stressors, and prevention behaviors and racial/ethnic group among adult women in the United States (N=473).

| Characteristic                                                       | Asian/<br>Pacific Islander <sup>a</sup> |                              | Black <sup>a</sup>          |                              | Latinx <sup>a</sup>         |                              | American Indian/<br>Alaskan Native <sup>a</sup> |                              | Multiracial & Other <sup>a</sup> |                              |
|----------------------------------------------------------------------|-----------------------------------------|------------------------------|-----------------------------|------------------------------|-----------------------------|------------------------------|-------------------------------------------------|------------------------------|----------------------------------|------------------------------|
|                                                                      | OR <sup>b</sup><br>(95% CI)             | AOR <sup>c</sup><br>(95% CI) | OR <sup>b</sup><br>(95% CI) | AOR <sup>c</sup><br>(95% CI) | OR <sup>b</sup><br>(95% CI) | AOR <sup>c</sup><br>(95% CI) | OR <sup>b</sup><br>(95% CI)                     | AOR <sup>c</sup><br>(95% CI) | OR <sup>b</sup><br>(95% CI)      | AOR <sup>c</sup><br>(95% CI) |
| <b>COVID-19 Related Outcomes</b>                                     |                                         |                              |                             |                              |                             |                              |                                                 |                              |                                  |                              |
| Know where to go to get tested for coronavirus                       | 0.35<br>(0.19-0.64)                     | 0.36<br>(0.19-0.70)          | 0.92<br>(0.51-1.66)         | 0.88<br>(0.46-1.68)          | 0.45<br>(0.23-0.86)         | 0.53<br>(0.26-1.06)          | 0.32<br>(0.13-0.76)                             | 0.26<br>(0.09-0.72)          | 0.52<br>(0.25-1.10)              | 0.56<br>(0.24-1.27)          |
| Had someone close to you hospitalized for coronavirus                | 0.32<br>(0.12-0.84)                     | 0.51<br>(0.18-1.42)          | 1.13<br>(0.58-2.21)         | 1.45<br>(0.68-3.10)          | 0.65<br>(0.27-1.53)         | 0.96<br>(0.39-2.37)          | 0.31<br>(0.07-1.35)                             | 0.45<br>(0.10-2.11)          | 0.37<br>(0.11-1.26)              | 0.56<br>(0.16-2.03)          |
| Family member hospitalized for coronavirus                           | 0.19<br>(0.02-1.41)                     | 0.24<br>(0.03-1.97)          | 2.62<br>(1.17-5.86)         | 3.24<br>(1.30-8.07)          | 0.51<br>(0.11-2.26)         | 0.60<br>(0.13-2.79)          | 0.45<br>(0.06-3.50)                             | 0.53<br>(0.06-4.58)          | 0.37<br>(0.05-2.82)              | 0.47<br>(0.06-3.91)          |
| <b>COVID-19 Related Stressors</b>                                    |                                         |                              |                             |                              |                             |                              |                                                 |                              |                                  |                              |
| Not enough food and no money to buy more                             | 6.95<br>(3.45-14.01)                    | 4.46<br>(1.90-10.49)         | 3.77<br>(1.75-8.12)         | 3.24<br>(1.28-8.20)          | 2.86<br>(1.20-6.82)         | 2.44<br>(0.83-7.15)          | 6.19<br>(2.44-15.75)                            | 3.58<br>(1.19-10.81)         | 4.65<br>(1.88-11.48)             | 4.26<br>(1.44-12.59)         |
| Not enough money to pay rent                                         | 5.07<br>(2.62-9.84)                     | 3.03<br>(1.39-6.63)          | 3.58<br>(1.77-7.21)         | 2.67<br>(1.15-6.20)          | 2.38<br>(1.05-5.37)         | 1.34<br>(0.49-3.64)          | 5.32<br>(2.19-12.92)                            | 2.96<br>(1.06-8.27)          | 2.43<br>(0.96-6.20)              | 1.47<br>(0.50-4.36)          |
| Homeschooling children                                               | 0.42<br>(0.19-0.93)                     | 0.71<br>(0.29-1.76)          | 0.90<br>(0.46-1.75)         | 1.30<br>(0.61-2.79)          | 0.88<br>(0.42-1.83)         | 1.09<br>(0.48-2.47)          | N/A <sup>d</sup>                                | N/A <sup>d</sup>             | 0.53<br>(0.20-1.43)              | 1.11<br>(0.38-3.30)          |
| Not being able to go to the doctor or have a phone/video appointment | 0.34<br>(0.17-0.70)                     | 0.40<br>(0.18-0.87)          | 0.61<br>(0.32-1.16)         | 0.74<br>(0.37-1.48)          | 0.48<br>(0.23-1.02)         | 0.61<br>(0.28-1.32)          | 0.32<br>(0.11-0.95)                             | 0.27<br>(0.08-0.98)          | 0.69<br>(0.31-1.55)              | 0.78<br>(0.33-1.87)          |
| Cannot sleep due to worry about getting coronavirus                  | 1.28<br>(1.03-1.60)                     | 1.31<br>(1.01-1.70)          | 0.83<br>(0.65-1.06)         | 0.80<br>(0.61-1.04)          | 1.15<br>(0.90-1.48)         | 1.02<br>(0.78-1.35)          | 1.79<br>(1.28-2.50)                             | 1.79<br>(1.21-2.65)          | 0.88<br>(0.65-1.19)              | 0.87<br>(0.62-1.23)          |
| Heart races when thinking about it                                   | 1.22<br>(0.98-1.51)                     | 1.20<br>(0.93-1.54)          | 0.86<br>(0.69-1.09)         | 0.82<br>(0.64-1.06)          | 1.03<br>(0.80-1.31)         | 0.91<br>(0.70-1.19)          | 1.53<br>(1.11-2.11)                             | 1.45<br>(1.01-2.09)          | 0.94<br>(0.70-1.25)              | 0.92<br>(0.67-1.27)          |
| Afraid of coronavirus                                                | 0.65<br>(0.51-0.82)                     | 0.78<br>(0.60-1.01)          | 0.80<br>(0.63-1.02)         | 0.88<br>(0.67-1.15)          | 0.88<br>(0.67-1.15)         | 0.91<br>(0.68-1.22)          | 0.80<br>(0.57-1.12)                             | 0.94<br>(0.64-1.38)          | 0.65<br>(0.48-0.87)              | 0.75<br>(0.53-1.06)          |
| Become nervous or anxious when watching news                         | 0.70<br>(0.56-0.88)                     | 0.74<br>(0.57-0.96)          | 0.88<br>(0.70-1.12)         | 0.92<br>(0.71-1.21)          | 0.84<br>(0.65-1.08)         | 0.84<br>(0.64-1.11)          | 0.95<br>(0.68-1.33)                             | 0.94<br>(0.63-1.40)          | 0.85<br>(0.63-1.15)              | 0.82<br>(0.58-1.16)          |

stories on social media

|                                       |                     |                     |                     |                     |                     |                     |                     |                     |                     |                     |
|---------------------------------------|---------------------|---------------------|---------------------|---------------------|---------------------|---------------------|---------------------|---------------------|---------------------|---------------------|
| Hands become clammy thinking about it | 1.33<br>(1.07-1.66) | 1.29<br>(0.99-1.66) | 1.08<br>(0.85-1.36) | 1.04<br>(0.80-1.36) | 1.47<br>(1.15-1.88) | 1.28<br>(0.98-1.67) | 1.91<br>(1.39-2.63) | 1.94<br>(1.32-2.84) | 0.81<br>(0.58-1.13) | 0.81<br>(0.56-1.16) |
|---------------------------------------|---------------------|---------------------|---------------------|---------------------|---------------------|---------------------|---------------------|---------------------|---------------------|---------------------|

**COVID-19 Prevention Behaviors**

|                                                                 |                      |                      |                     |                     |                     |                     |                      |                      |                     |                     |
|-----------------------------------------------------------------|----------------------|----------------------|---------------------|---------------------|---------------------|---------------------|----------------------|----------------------|---------------------|---------------------|
| Washing hands with soap                                         | 0.79<br>(0.16-4.02)  | 1.05<br>(0.19-5.78)  | 0.36<br>(0.10-1.31) | 0.50<br>(0.13-1.95) | 0.59<br>(0.12-3.00) | N/A <sup>e</sup>    | 0.11<br>(0.03-0.40)  | 0.17<br>(0.04-0.71)  | 0.40<br>(0.08-2.05) | 0.57<br>(0.10-3.20) |
| Isolating yourself at home and away from others if you are sick | 2.24<br>(1.19-4.22)  | 2.21<br>(1.08-4.53)  | 0.73<br>(0.42-1.29) | 0.64<br>(0.34-1.20) | 1.05<br>(0.56-1.97) | 1.04<br>(0.52-2.08) | 1.17<br>(0.51-2.65)  | 0.96<br>(0.38-2.37)  | 0.57<br>(0.28-1.19) | 0.52<br>(0.23-1.18) |
| Using gloves in public                                          | 6.00<br>(3.26-11.05) | 4.99<br>(2.52-9.88)  | 1.80<br>(1.01-3.21) | 1.53<br>(0.80-2.93) | 1.41<br>(0.74-2.69) | 1.28<br>(0.63-2.59) | 5.57<br>(2.33-13.32) | 4.05<br>(1.58-10.37) | 0.88<br>(0.39-1.99) | 0.74<br>(0.30-1.81) |
| Not leaving your home for any activities                        | 4.77<br>(2.62-8.68)  | 5.13<br>(2.58-10.18) | 1.65<br>(0.93-2.93) | 1.57<br>(0.81-3.03) | 1.32<br>(0.70-2.50) | 1.30<br>(0.63-2.65) | 4.03<br>(1.73-9.36)  | 3.85<br>(1.52-9.75)  | 2.14<br>(1.03-4.45) | 1.95<br>(0.85-4.44) |

<sup>a</sup>Reference for the dependent variable of race is 'White' for each of the racial/ethnic group comparisons.

<sup>b</sup>All unadjusted models included race and one independent variable.

<sup>c</sup>All adjusted models included race and one independent variable, while adjusting for age, education, income, and type of residential community.

<sup>d</sup>Zero 'Checked' responses for 'Homeschooling children' for American Indian or Alaskan Native respondents.

<sup>e</sup>Zero 'Unchecked' responses for 'Washing hands with soap' for Latinx respondents.
